# Supplementary material for: Neuroprotective effects of salidroside against 6-OHDA-induced oxidative stress in PC12 cells
Source: Royal Society of Chemistry journal article supplement (doi:10.1039/d3nj01746j), 2023-01-01
Supplement: d3nj01746j4.pdf [file d3nj01746j4.pdf]

## Supporting Information

### **Neuroprotective effect of salidroside against 6-OHDA-induced oxidative stress in PC12 cells**

Minyan Li,<sup>‡ a</sup> Sha Wang,<sup>‡ a</sup> Chunmei Fu,<sup>‡ a</sup> Hongyu Chen,<sup>a</sup> Yuxia Su,<sup>c</sup> Peng Wu,<sup>\*,a</sup> Xinhao Yan,<sup>\*,a</sup> and Juanjuan Gao<sup>\*,b</sup>

<sup>a</sup>Hanzhong Key Laboratory of Clinical Molecular Biology, Hanzhong Vocational and Technical College, Hanzhong 723002, P. R. China.

<sup>b</sup>Department of Neurology, Hanzhong People's Hospital, Hanzhong 723000, P. R. China.

<sup>c</sup>Department of Pharmacy, Hanzhong People's Hospital, Hanzhong 723000, P. R. China.

<sup>‡</sup> These authors contributed equally to this work.

Correspondence: [butterking178@126.com](mailto:butterking178@126.com); [xhyan82@163.com](mailto:xhyan82@163.com); [gaojuanjuan1984@163.com](mailto:gaojuanjuan1984@163.com)

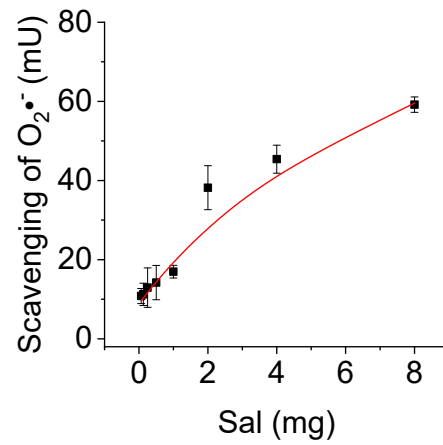

**Figure S1.** Dose-dependent elimination of superoxide anion by Sal.

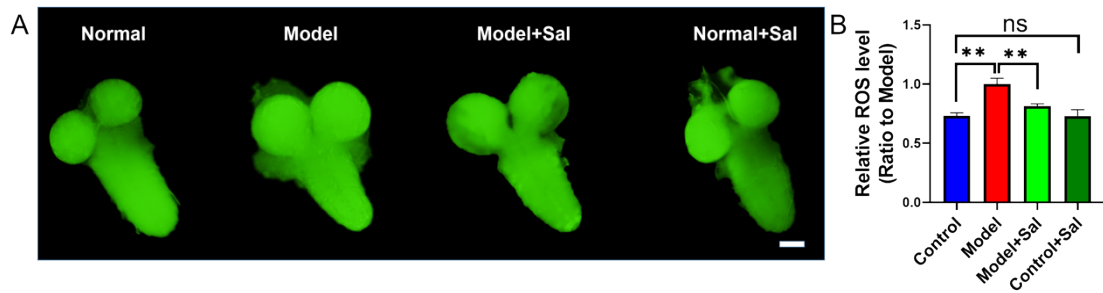

**Figure S2.** DCFH-DA staining in 4d-larvae brains. Typical fluorescence images A) and quantification of ROS level by using ImageJ software B). Scale bars: 50  $\mu$  m. Data are mean  $\pm$  SD (n = 3). \*p < 0.05, \*\*p < 0.01.
