# Supplementary figures and images for: Neuroprotective effects of salidroside against 6-OHDA-induced oxidative stress in PC12 cells
Source: Royal Society of Chemistry journal article supplement (doi:10.1039/d3nj01746j), 2023-01-01

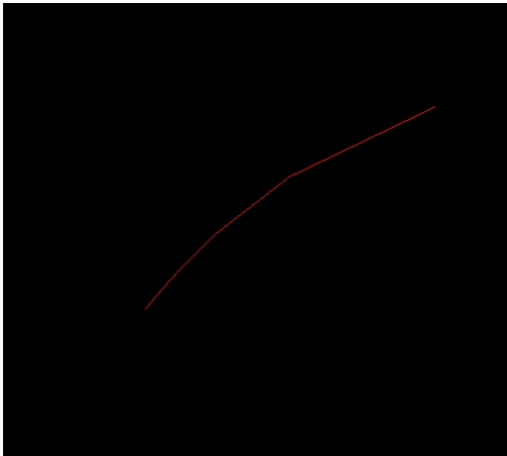

Supplement: d3nj01746j2.pdf [file d3nj01746j2.pdf]

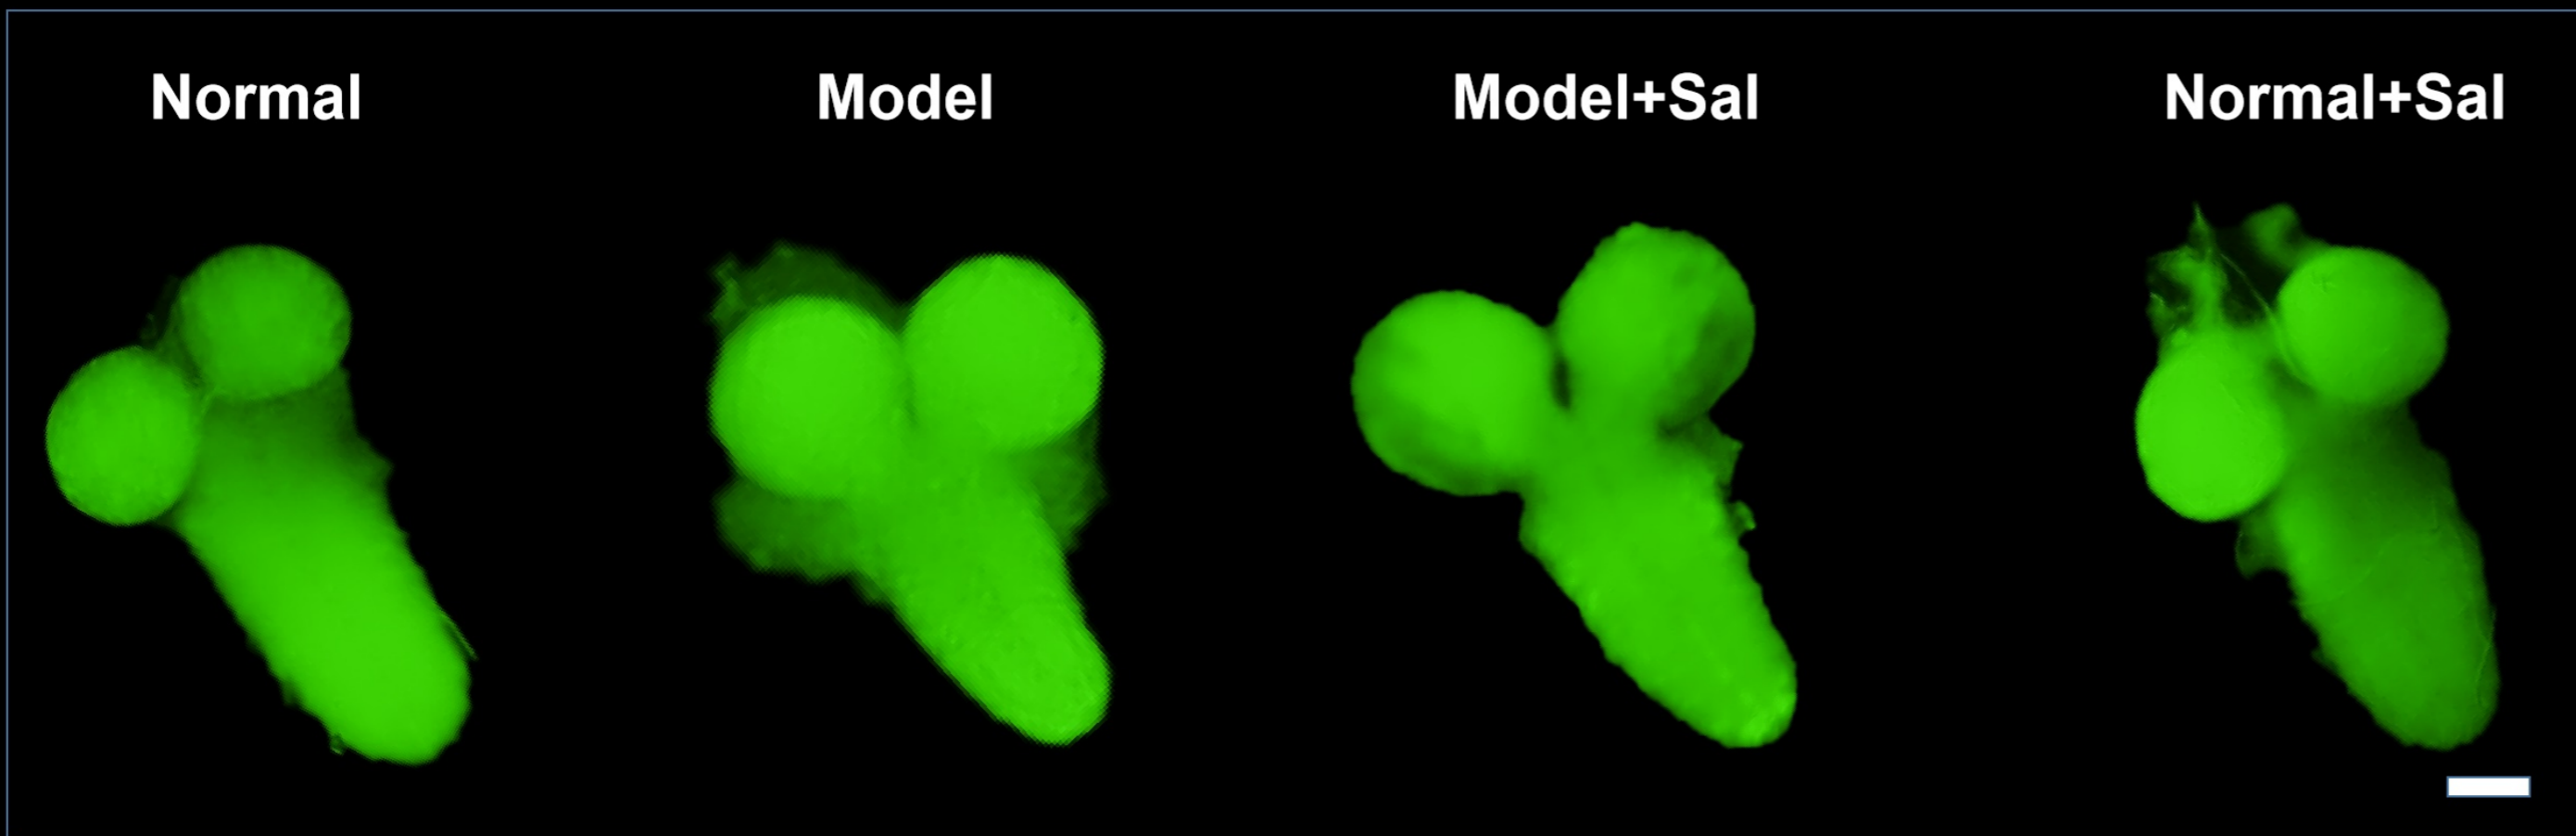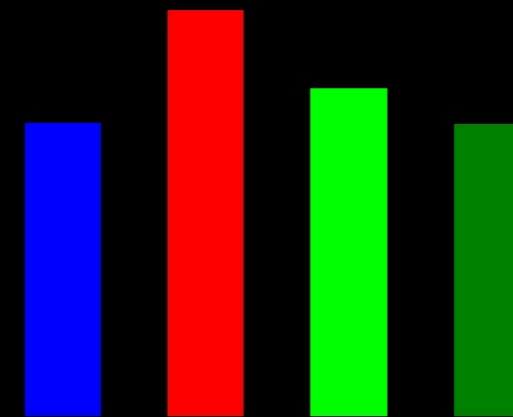

Supplement: d3nj01746j3.pdf [file d3nj01746j3.pdf]
